# Supplementary material for: Impacts of Sn precursors on solution-processed amorphous zinc–tin oxide films and their transistors
Source: Royal Society of Chemistry journal article supplement (doi:10.1039/c2ra00764a), 2012-01-01
Supplement: c2ra00764a.pdf [file c2ra00764a.pdf]

## Supporting Figures

**Fig. S1.** High resolution SEM images of the sections of ZTO films: ZTO 1 was derived from  $\text{Zn}(\text{CH}_3\text{COO})_2 \cdot 2\text{H}_2\text{O}$  and  $\text{Sn}(\text{C}_8\text{H}_{15}\text{O}_2)_2$  dissolved in 2-methoxyethanol; ZTO 2 was derived from  $\text{Zn}(\text{CH}_3\text{COO})_2 \cdot 2\text{H}_2\text{O}$  and  $\text{Sn}(\text{CH}_3\text{COO})_4$  dissolved in 2-methoxyethanol; ZTO 3 was derived from  $\text{Zn}(\text{CH}_3\text{COO})_2 \cdot 2\text{H}_2\text{O}$  and  $\text{SnCl}_2$  dissolved in 2-methoxyethanol; ZTO 4 was derived from  $\text{Zn}(\text{CH}_3\text{COO})_2 \cdot 2\text{H}_2\text{O}$  and  $\text{Sn}(\text{OC}_3\text{H}_7)_4$  dissolved in 2-methoxyethanol.

**Fig. S2.** XPS spectra of ZTO films: (a) XPS spectra of ZTO 1 thin film; (b) XPS spectra of ZTO 2 thin film; (c) XPS spectra of ZTO 3 thin film; (d) XPS spectra of ZTO 4 thin film.

**Fig. S3.** AES spectra of ZTO films: (a) AES spectra of ZTO 1 thin film; (b) AES spectra of ZTO 2 thin film; (c) AES spectra of ZTO 3 thin film; (d) AES spectra of ZTO 4 thin film.

**Fig. S4.** The output characteristics of ZTO thin films based FETs: (a) output characteristics of ZTO 1-FET; (b) output characteristics of ZTO 2-FET; (c) output characteristics of ZTO 3-FET; (d) output characteristics of ZTO 4-FET.

**Fig. S5.** The transfer characteristics between  $V_G$  and  $\text{SQRT}$  of  $I_D$  of ZTO thin films based FETs.

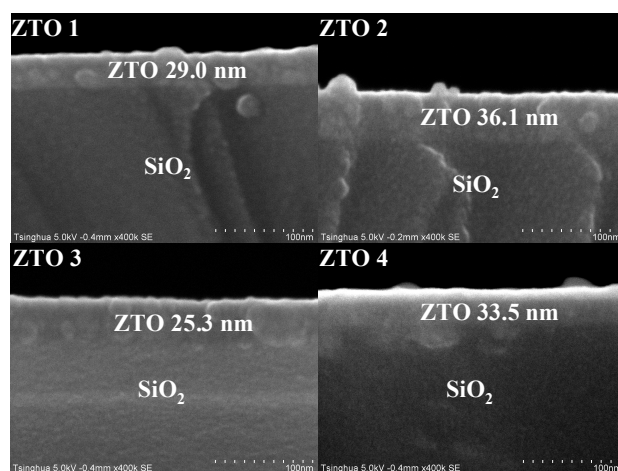

**Fig. S1.** High resolution SEM images of the sections of ZTO films: ZTO 1 was derived from  $\text{Zn}(\text{CH}_3\text{COO})_2 \cdot 2\text{H}_2\text{O}$  and  $\text{Sn}(\text{C}_8\text{H}_{15}\text{O}_2)_2$  dissolved in 2-methoxyethanol; ZTO 2 was derived from  $\text{Zn}(\text{CH}_3\text{COO})_2 \cdot 2\text{H}_2\text{O}$  and  $\text{Sn}(\text{CH}_3\text{COO})_4$  dissolved in 2-methoxyethanol; ZTO 3 was derived from  $\text{Zn}(\text{CH}_3\text{COO})_2 \cdot 2\text{H}_2\text{O}$  and  $\text{SnCl}_2$  dissolved in 2-methoxyethanol; ZTO 4 was derived from  $\text{Zn}(\text{CH}_3\text{COO})_2 \cdot 2\text{H}_2\text{O}$  and  $\text{Sn}(\text{OC}_3\text{H}_7)_4$  dissolved in 2-methoxyethanol.

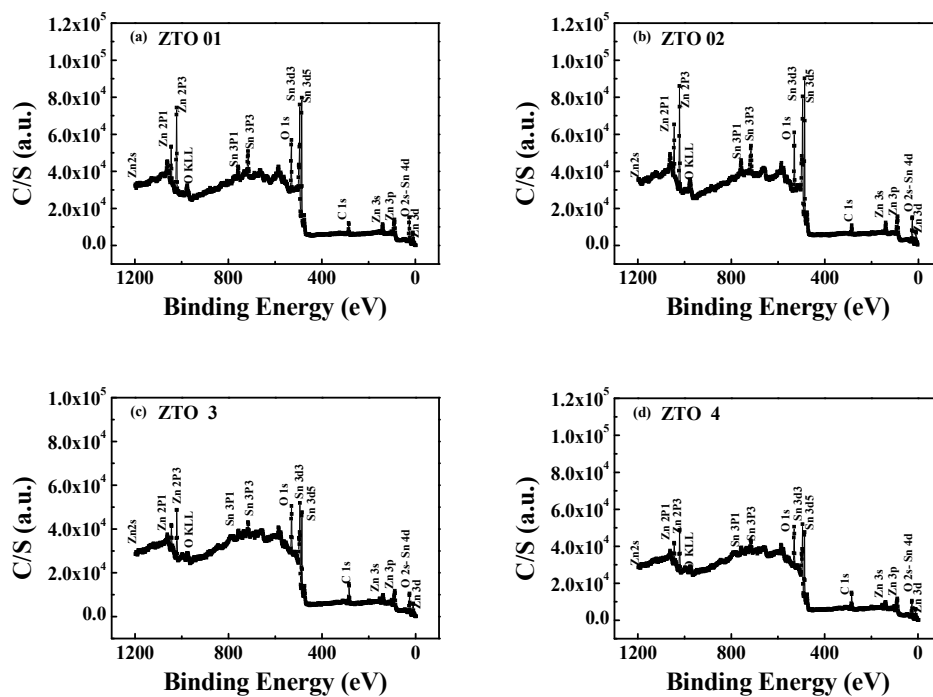

**Fig. S2.** XPS spectra of ZTO films: (a) XPS spectra of ZTO 1 thin film; (b) XPS spectra of ZTO 2 thin film; (c) XPS spectra of ZTO 3 thin film; (d) XPS spectra of ZTO 4 thin film.

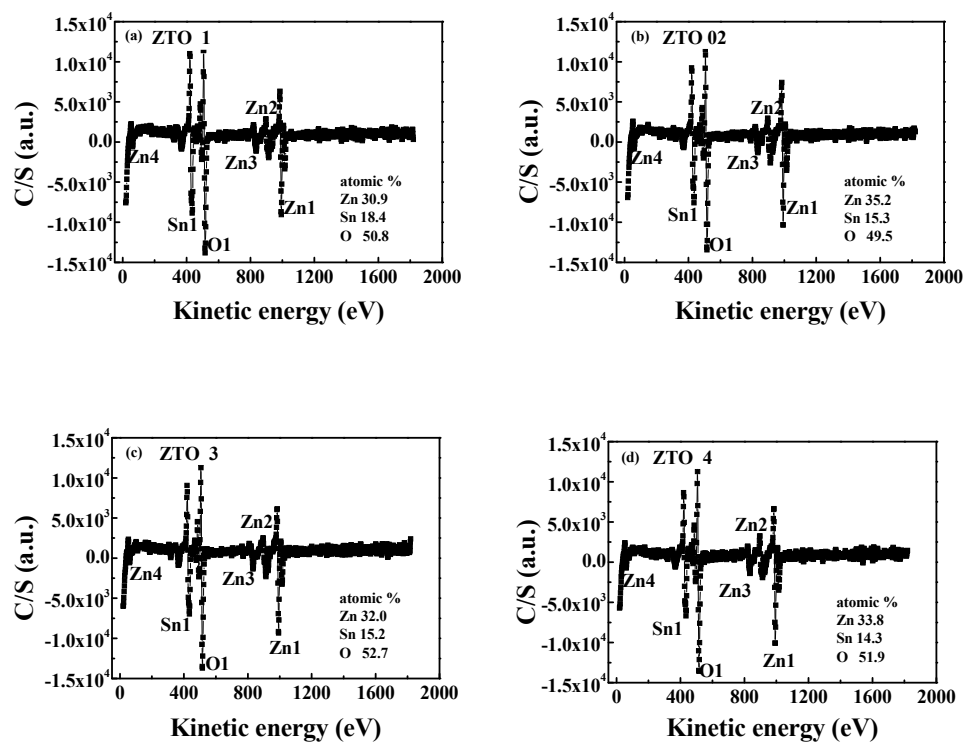

**Fig. S3.** AES spectra of ZTO films: (a) AES spectra of ZTO 1 thin film; (b) AES spectra of ZTO 2 thin film; (c) AES spectra of ZTO 3 thin film; (d) AES spectra of ZTO 4 thin film.

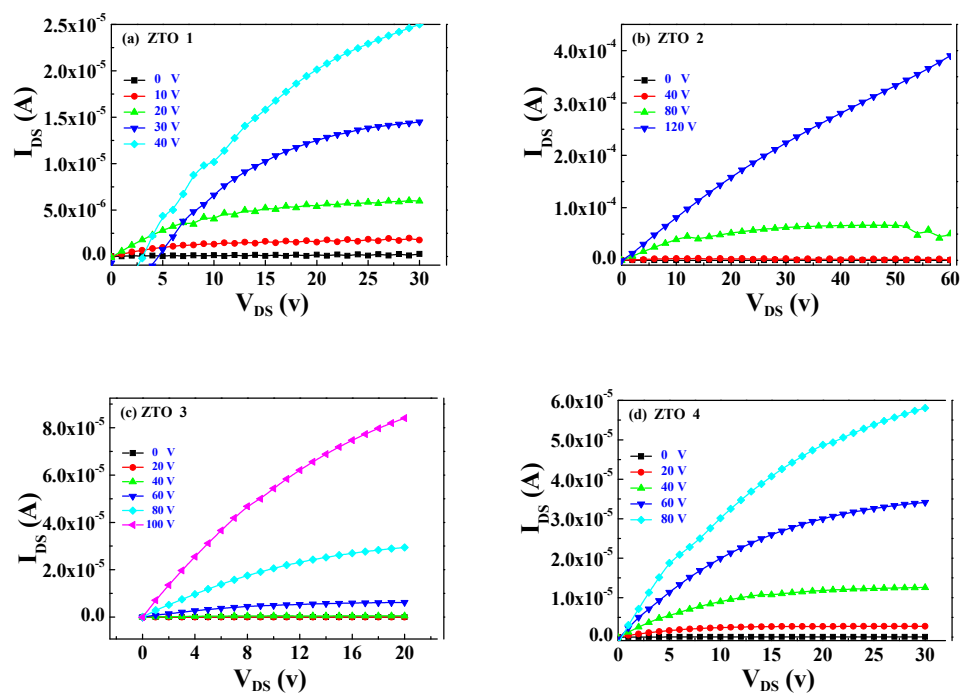

**Fig. S4.** The output characteristics of ZTO thin films based FET devices: (a) output characteristics of ZTO 1-FET; (b) output characteristics of ZTO 2-FET; (c) output characteristics of ZTO 3-FET; (d) output characteristics of ZTO 4-FET.

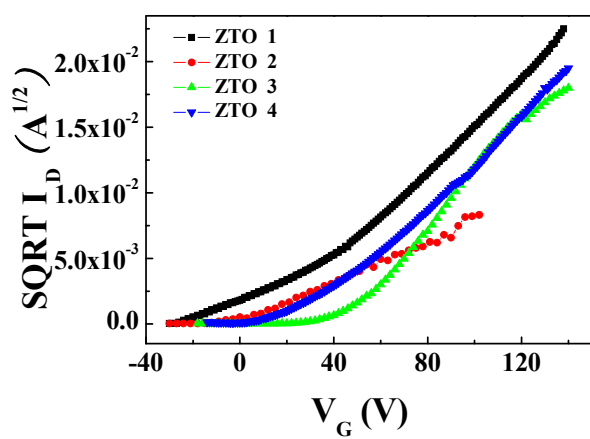

Fig. S5. The transfer characteristics between  $V_G$  and  $\text{SQRT } I_D$  of ZTO thin films based FET devices.
